# Supplementary material for: Single-cell immune profiling and validation of PBMCs in the onset of and recovery from herpes zoster
Source: PubMed Central journal article supplement — Commun Biol. 2024 Dec 4;7:1617. doi: 10.1038/s42003-024-07289-w (PMC11618686; doi:10.1038/s42003-024-07289-w), 2024-12-04
Supplement: 42003_2024_7289_MOESM2_ESM.pdf [file 42003_2024_7289_MOESM2_ESM.pdf]

| <b>Supplementary Table 1. Patient Information for scRNA-seq</b> |            |            |                              |
|-----------------------------------------------------------------|------------|------------|------------------------------|
| <b>Sample ID</b>                                                | <b>Sex</b> | <b>Age</b> | <b>State</b>                 |
| HA1                                                             | male       | 55         | healthy                      |
| HA2                                                             | male       | 60         | healthy                      |
| HA3                                                             | male       | 49         | healthy                      |
| HP1                                                             | male       | 61         | herpes zoster                |
| HP2                                                             | male       | 66         | herpes zoster                |
| HP3                                                             | female     | 28         | herpes zoster                |
| RP1                                                             | female     | 61         | recovered from herpes zoster |
| RP2                                                             | male       | 66         | recovered from herpes zoster |
| RP3                                                             | female     | 58         | recovered from herpes zoster |

**Supplementary Table 2. Details of antibodies**

| <b>Antibody</b> | <b>Specificity</b> | <b>Clone</b> | <b>Vendor</b> | <b>Fluorochrome</b> | <b>Cat#</b> | <b>Usage</b> |
|-----------------|--------------------|--------------|---------------|---------------------|-------------|--------------|
| CD45RO          | human              | UCHL1        | BD            | APC-Cy7             | 304227      | flow         |
| CD33            | human              | P67.6        | BioLegend     | APC                 | 366605      | flow         |
| CD56            | human              | HCD56        | BioLegend     | APC                 | 318309      | flow         |
| KLRG1           | human              | SA231A2      | ThermoFisher  | PerCP-Cy5.5         | 367707      | flow         |
| CD25            | human              | M-A251       | BioLegend     | APC                 | 356109      | flow         |
| CD138           | human              | DL101        | BioLegend     | APC                 | 352307      | flow         |
| CD3             | human              | OKT3         | BioLegend     | FITC                | 317305      | flow         |
| CD8             | human              | SK1          | BioLegend     | BV510               | 344731      | flow         |
| CD4             | human              | RPA-T4       | BioLegend     | PerCP-Cy5.5         | 300529      | flow         |
| CD62L           | human              | DREG-56      | BioLegend     | PE                  | 304805      | flow         |
| CD66b           | human              | 6/40C        | BioLegend     | BV421               | 392915      | flow         |
| CD192           | human              | KO36C2       | BioLegend     | PE                  | 357205      | flow         |
| CD11b           | human              | ICRF44       | BioLegend     | FITC                | 301329      | flow         |
| CD244           | human              | 2-69         | BioLegend     | PE                  | 393507      | flow         |
| CD122           | human              | TU27         | BioLegend     | PE-Cy7              | 339013      | flow         |
| CD14            | human              | 63D3         | BioLegend     | PerCP-Cy5.5         | 367109      | flow         |
| CD196           | human              | G034E3       | BioLegend     | PE                  | 353409      | flow         |
| CD16            | human              | EPR22409-124 | ABCAM         | AV488               | AB270139    | flow         |
| CD27            | human              | 323          | EBOSCIENCE    | FITC                | 11-0279-42  | flow         |
| CD19            | human              | 6D5          | ABCAM         | APC                 | AB25484     | flow         |

**Supplementary Table 3. surface antibody panel**

| Panel  | Antibody | Specificity | Clone        | Vendor       | Fluorochrome | Cat#     |
|--------|----------|-------------|--------------|--------------|--------------|----------|
| Fig.5a | CD3      | human       | OKT3         | BioLegend    | FITC         | 317305   |
|        | CD8      | human       | SK1          | BioLegend    | BV510        | 344731   |
|        | CD4      | human       | RPA-T4       | BioLegend    | PerCP-Cy5.5  | 300529   |
| Fig.5o | CD3      | human       | OKT3         | BioLegend    | FITC         | 317305   |
|        | CD8      | human       | SK1          | BioLegend    | BV510        | 344731   |
|        | KLRG1    | human       | SA231A2      | ThermoFisher | PerCP-Cy5.5  | 367707   |
|        | CD122    | human       | TU27         | BioLegend    | PE-Cy7       | 339013   |
|        | CD45RO   | human       | UCHL1        | BD           | APC-Cy7      | 304227   |
|        | CD62L    | human       | DREG-56      | BioLegend    | PE           | 304805   |
| Fig.6i | CD62L    | human       | DREG-56      | BioLegend    | PE           | 304805   |
|        | CD66b    | human       | 6/40C        | BioLegend    | BV421        | 392915   |
|        | CD11b    | human       | ICRF44       | BioLegend    | FITC         | 301329   |
|        | CD14     | human       | 63D3         | BioLegend    | PerCP-Cy5.5  | 367109   |
| Fig.7j | CD14     | human       | 63D3         | BioLegend    | PerCP-Cy5.5  | 367109   |
|        | CD16     | human       | EPR22409-124 | ABCAM        | AV488        | AB270139 |
| Fig.8i | CD19     | human       | 6D5          | ABCAM        | APC          | AB25484  |

**Supplementary Table 4. Patient Information for flow cytometry analysis**

| <b>Sample ID</b> | <b>Sex</b> | <b>State</b>  |
|------------------|------------|---------------|
| HA4              | male       | healthy       |
| HA5              | male       | healthy       |
| HA6              | male       | healthy       |
| HA7              | male       | healthy       |
| HA8              | male       | healthy       |
| HA9              | male       | healthy       |
| HA10             | male       | healthy       |
| HA11             | male       | healthy       |
| HA12             | male       | healthy       |
| HA13             | male       | healthy       |
| HA14             | male       | healthy       |
| HA15             | male       | healthy       |
| HA16             | male       | healthy       |
| HA17             | male       | healthy       |
| HA18             | male       | healthy       |
| HA19             | male       | healthy       |
| HA20             | male       | healthy       |
| HA21             | male       | healthy       |
| HA22             | male       | healthy       |
| HA23             | male       | healthy       |
| HP4              | male       | herpes zoster |
| HP5              | male       | herpes zoster |
| HP6              | male       | herpes zoster |
| HP7              | male       | herpes zoster |
| HP8              | male       | herpes zoster |
| HP9              | male       | herpes zoster |
| HP10             | male       | herpes zoster |
| HP11             | male       | herpes zoster |
| HP12             | male       | herpes zoster |
| HP13             | male       | herpes zoster |
| HP14             | male       | herpes zoster |
| HP15             | male       | herpes zoster |
| HP16             | male       | herpes zoster |
| HP17             | male       | herpes zoster |
| HP18             | male       | herpes zoster |
| HP19             | male       | herpes zoster |
| HP20             | male       | herpes zoster |
| HP21             | male       | herpes zoster |
| HP22             | male       | herpes zoster |

| <b>Supplementary Table 5. Abbreviations and acronyms</b> |                                      |
|----------------------------------------------------------|--------------------------------------|
| HZ                                                       | Herpes zoster                        |
| VZV                                                      | varicella-zoster virus               |
| PHN                                                      | postherpetic neuralgia               |
| PBMCs                                                    | peripheral blood mononuclear cells   |
| HSV-1                                                    | herpes simplex virus 1               |
| HSV-2                                                    | herpes simplex virus 2               |
| HA                                                       | healthy control                      |
| HP                                                       | patient with herpes zoster           |
| RP                                                       | patient recovered from herpes zoster |
| scRNA-seq                                                | single-cell RNA sequencing           |
| Teff                                                     | effector T cells                     |
| Tem                                                      | effector memory T cells              |
| OCR                                                      | open chromatin regions               |
| DAR                                                      | differently accessible regions       |



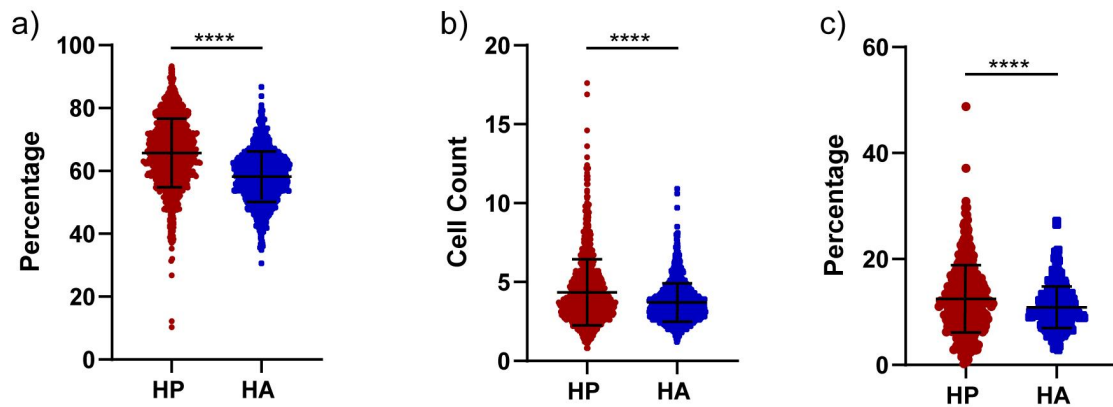

**Supplementary Figure. 2 clinical analysis from healthy controls and herpes zoster patients, related to fig 2.**

(a-b) Blood routine analysis of the numbers and frequencies of neutrophils from healthy controls and herpes zoster patients. (c) Blood routine analysis of the frequencies of B cells from healthy controls and herpes zoster patients. Unpaired t-test were used and the data represent the means  $\pm$  SEM. \*\*\*P < 0. 001, \*\*\*\*P < 0. 0001.

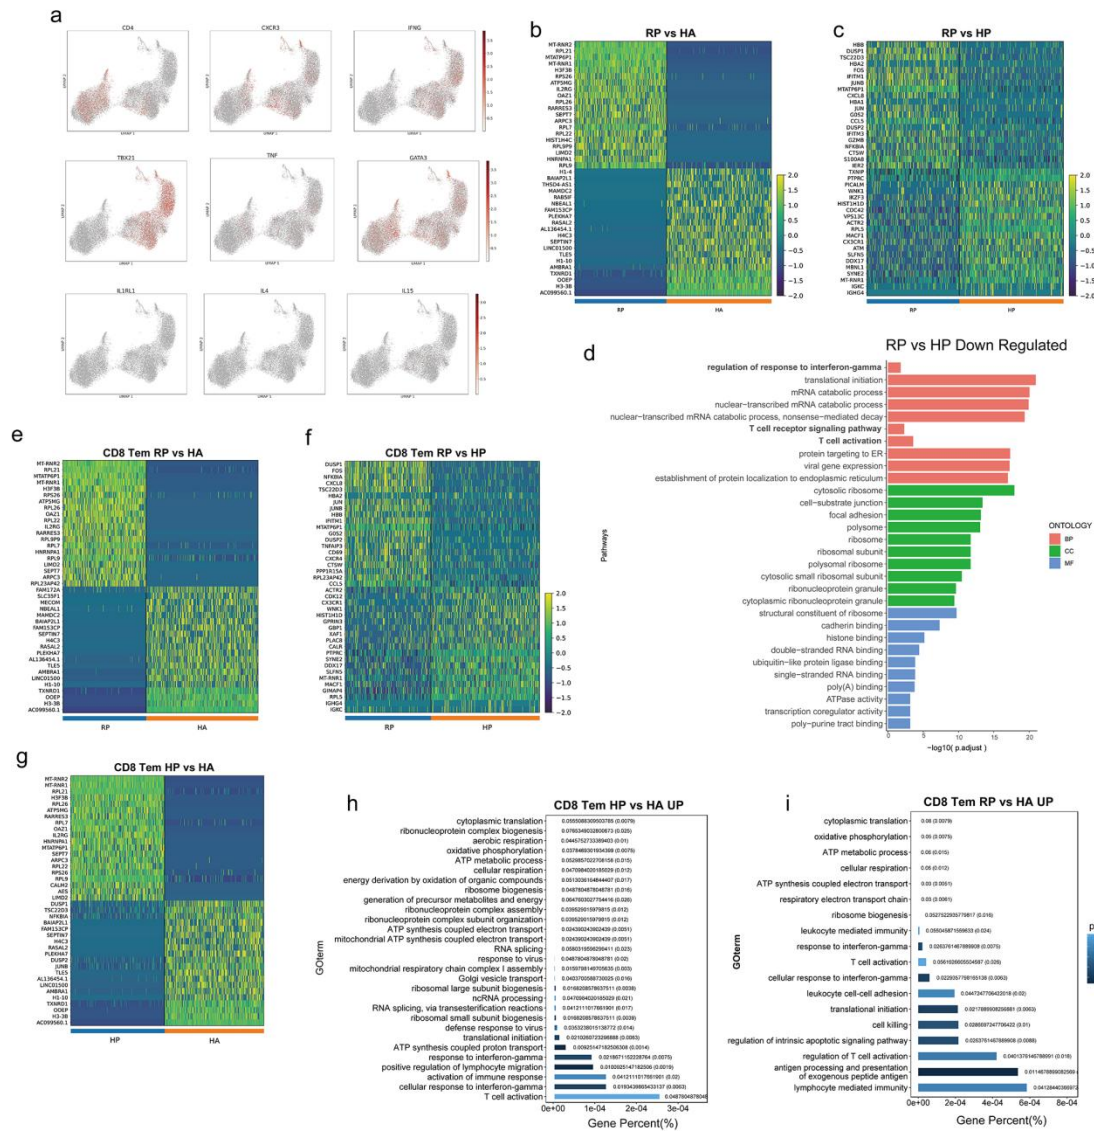

### Supplementary Figure. 3 Analysis of T subsets landscape in HA, HP and RP group.

(a) The UAMP plot showing subtype specific marker genes of CD4+ T cells. (b) The heatmap shows the DEGs of CD8+ Teff cells between the RP group and HA group. (c) The heatmap shows the DEGs of CD8+ Teff cells between the RP group and HP group. (d) GO enrichment analysis for the DEGs of CD8+ Teff cells down-regulated in RP group than HP group. P value was derived by a hypergeometric test. (e) The heatmap shows the DEGs of CD8+ Tem cells between the RP group and HA group. (f) The heatmap shows the DEGs of CD8+ Tem cells between the RP group and HP group. (g) The heatmap shows the DEGs of CD8+ Tem cells between the HP group and HA group. (h) GO BP enrichment analysis for the DEGs of the CD8+ Tem cell up-regulated in HP group than HA group. P value was derived by a hypergeometric test. (i) GO BP enrichment analysis for the DEGs of the CD8+ Tem cell up-regulated in RP group than HA group. P value was derived by a hypergeometric test.



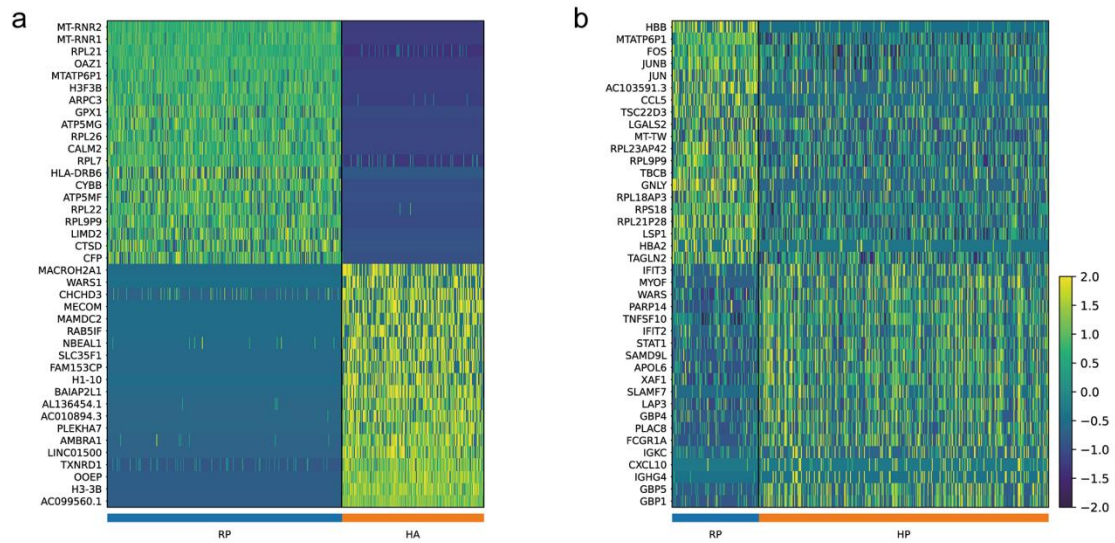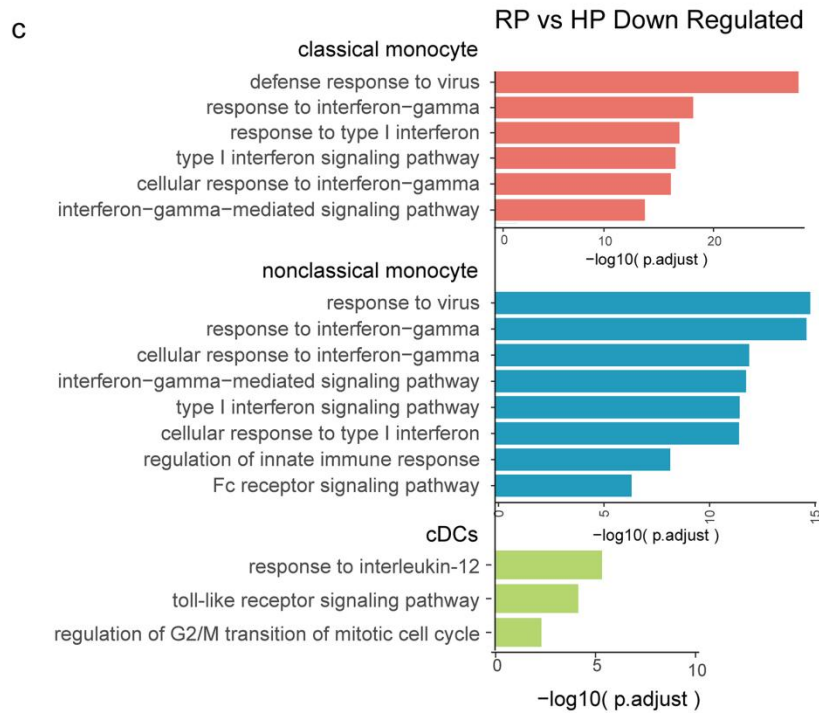

**Supplementary figure. 4 the functional enrichment analysis of MPs between RP group than hp group,related to fig 7.**

(a) The heatmap shows the DEGs of MPs cells between the HAs, and herpes zoster patients (RP) patients. (b) The heatmap shows the DEGs of MPs cells between the HPs, and herpes zoster patients (RP) patients. (c) GO BP enrichment analysis for the DEGs of three MPs subpopulations down-regulated in RP group than HP group. P value was derived by a hypergeometric test.

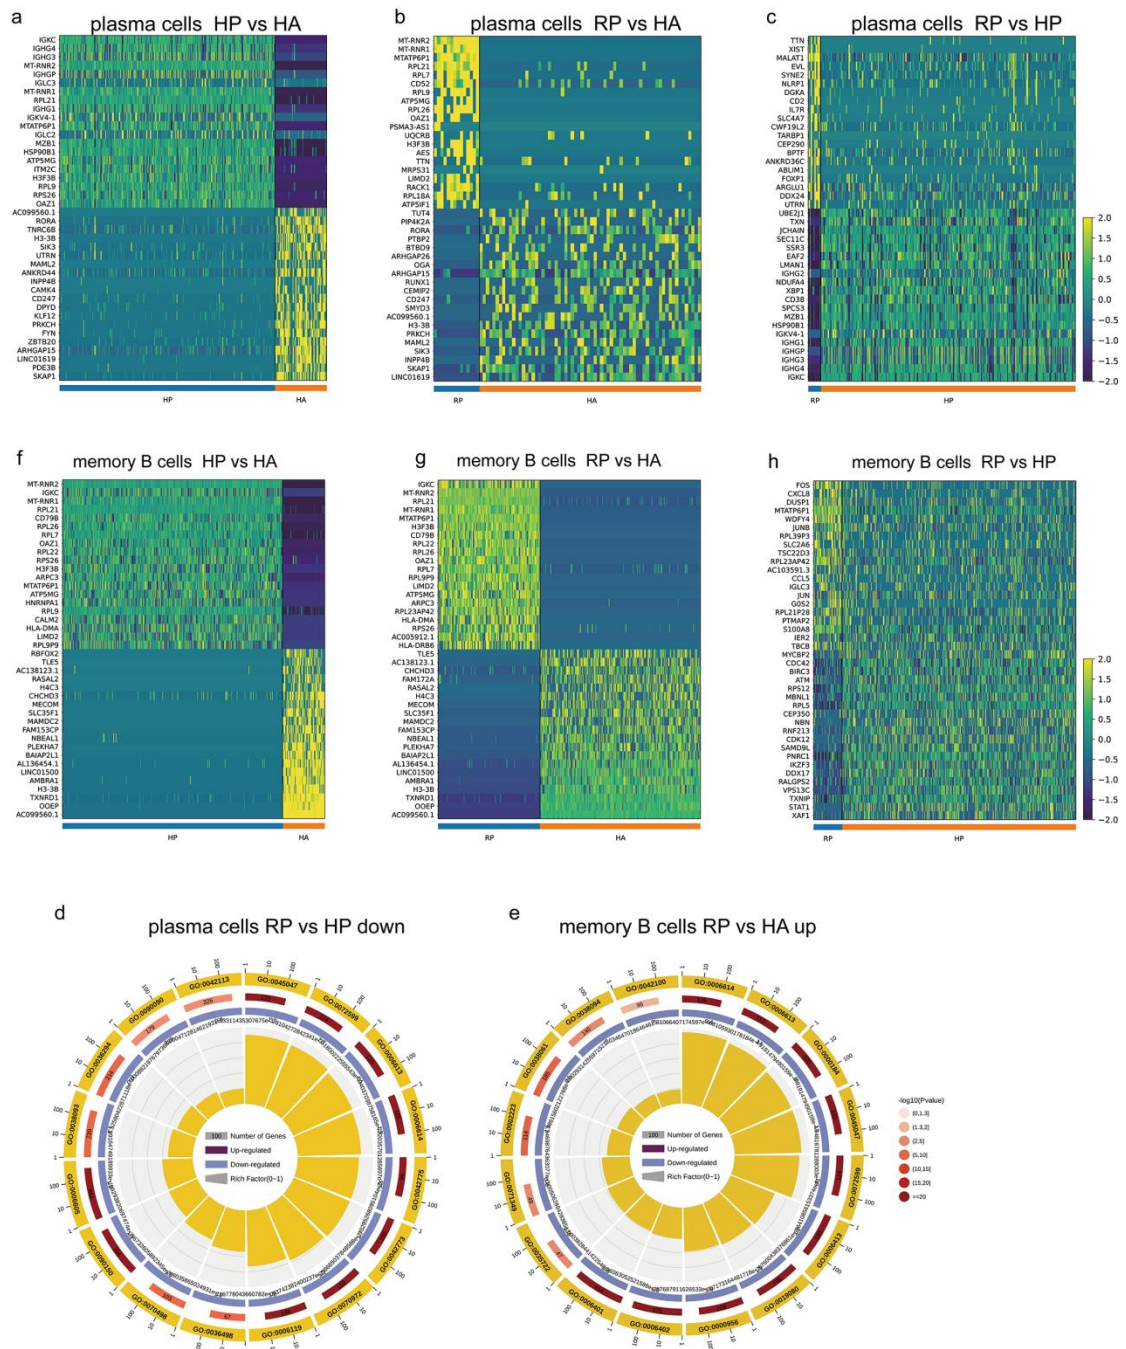

**Supplementary Figure. 5 Analysis of B subsets landscape in HA, HP and RP group.**

(a) The heatmap shows the DEGs of plasma cells between the HP group and HA group. (b) The heatmap shows the DEGs of CD8+ Tem cells between the RP group and HA group. (c) The heatmap shows the DEGs of CD8+ Tem cells between the RP group and HP group. (d) GO BP enrichment analysis for the DEGs of the plasma cell down-regulated in RP group than HP group. P value was derived by a hypergeometric test. (e) GO BP enrichment analysis for the DEGs of the memory B cell up-regulated in RP group than HA group. P value was derived by a hypergeometric test. (f) The heatmap shows the DEGs of memory B cells between the HP group and HA group. (g) The heatmap shows the DEGs of memory B cells between the RP group and HA

group. (h) The heatmap shows the DEGs of memory B cells between the RP group and HP group.
