# Supplementary material for: Single-cell immune profiling and validation of PBMCs in the onset of and recovery from herpes zoster
Source: PubMed Central journal article supplement — Commun Biol. 2024 Dec 4;7:1617. doi: 10.1038/s42003-024-07289-w (PMC11618686; doi:10.1038/s42003-024-07289-w), 2024-12-04
Supplement: 42003_2024_7289_MOESM3_ESM.pdf [file 42003_2024_7289_MOESM3_ESM.pdf]

## **Description of Additional Supplementary Files**

**File name:** Supplementary Data 1

**Description:** This file provided the numerical source data for graphs and charts in the main manuscript and numbered in the order of figures.

**File name:** Supplementary Data 2

**Description:** This file provided the numerical source data for graphs and charts in the supplementary information and numbered in the order of figures.
