# Supplementary material for: Single-cell immune profiling and validation of PBMCs in the onset of and recovery from herpes zoster
Source: PubMed Central journal article supplement — Commun Biol. 2024 Dec 4;7:1617. doi: 10.1038/s42003-024-07289-w (PMC11618686; doi:10.1038/s42003-024-07289-w), 2024-12-04
Supplement: 42003_2024_7289_MOESM6_ESM.pdf [file 42003_2024_7289_MOESM6_ESM.pdf]

## Reporting Summary

Nature Portfolio wishes to improve the reproducibility of the work that we publish. This form provides structure for consistency and transparency in reporting. For further information on Nature Portfolio policies, see our [Editorial Policies](#) and the [Editorial Policy Checklist](#).

### Statistics

For all statistical analyses, confirm that the following items are present in the figure legend, table legend, main text, or Methods section.

| n/a                      | Confirmed                                                                                                                                                                                                                                                                                      |
|--------------------------|------------------------------------------------------------------------------------------------------------------------------------------------------------------------------------------------------------------------------------------------------------------------------------------------|
| <input type="checkbox"/> | <input checked="" type="checkbox"/> The exact sample size ( $n$ ) for each experimental group/condition, given as a discrete number and unit of measurement                                                                                                                                    |
| <input type="checkbox"/> | <input checked="" type="checkbox"/> A statement on whether measurements were taken from distinct samples or whether the same sample was measured repeatedly                                                                                                                                    |
| <input type="checkbox"/> | <input checked="" type="checkbox"/> The statistical test(s) used AND whether they are one- or two-sided<br><i>Only common tests should be described solely by name; describe more complex techniques in the Methods section.</i>                                                               |
| <input type="checkbox"/> | <input checked="" type="checkbox"/> A description of all covariates tested                                                                                                                                                                                                                     |
| <input type="checkbox"/> | <input checked="" type="checkbox"/> A description of any assumptions or corrections, such as tests of normality and adjustment for multiple comparisons                                                                                                                                        |
| <input type="checkbox"/> | <input checked="" type="checkbox"/> A full description of the statistical parameters including central tendency (e.g. means) or other basic estimates (e.g. regression coefficient) AND variation (e.g. standard deviation) or associated estimates of uncertainty (e.g. confidence intervals) |
| <input type="checkbox"/> | <input checked="" type="checkbox"/> For null hypothesis testing, the test statistic (e.g. $F$ , $t$ , $r$ ) with confidence intervals, effect sizes, degrees of freedom and $P$ value noted<br><i>Give <math>P</math> values as exact values whenever suitable.</i>                            |
| <input type="checkbox"/> | <input checked="" type="checkbox"/> For Bayesian analysis, information on the choice of priors and Markov chain Monte Carlo settings                                                                                                                                                           |
| <input type="checkbox"/> | <input checked="" type="checkbox"/> For hierarchical and complex designs, identification of the appropriate level for tests and full reporting of outcomes                                                                                                                                     |
| <input type="checkbox"/> | <input checked="" type="checkbox"/> Estimates of effect sizes (e.g. Cohen's $d$ , Pearson's $r$ ), indicating how they were calculated                                                                                                                                                         |

*Our web collection on [statistics for biologists](#) contains articles on many of the points above.*

### Software and code

Policy information about [availability of computer code](#)

|                 |                                                                                                                                                                           |
|-----------------|---------------------------------------------------------------------------------------------------------------------------------------------------------------------------|
| Data collection | 1.KEGG: KEGG.db 1.0 KEGGREST 1.34.0<br>2.GO: GO.db 3.14.0 org.Hs.eg.db 3.14.0 clusterProfiler v4.0.0<br>3.The GSEA-enriched pathway used KEGG, Msigdb v7.5.1              |
| Data analysis   | This article contains no original code. Any additional information required to reanalyze the data reported in this paper is available from the lead contact upon request. |

For manuscripts utilizing custom algorithms or software that are central to the research but not yet described in published literature, software must be made available to editors and reviewers. We strongly encourage code deposition in a community repository (e.g. GitHub). See the Nature Portfolio [guidelines for submitting code & software](#) for further information.

### Data

Policy information about [availability of data](#)

All manuscripts must include a [data availability statement](#). This statement should provide the following information, where applicable:

- Accession codes, unique identifiers, or web links for publicly available datasets
- A description of any restrictions on data availability
- For clinical datasets or third party data, please ensure that the statement adheres to our [policy](#)

The raw sequence data reported in this paper have been deposited in the Genome Sequence Archive (Genomics, Proteomics & Bioinformatics 2021) in National

## Research involving human participants, their data, or biological material

Policy information about studies with [human participants or human data](#). See also policy information about [sex, gender \(identity/presentation\), and sexual orientation](#) and [race, ethnicity and racism](#).

### Reporting on sex and gender

sex and gender were considered in this study, the details were shown as below; Written consents were obtained from each participant for sharing individual-level data.

Sample ID Sex Age State  
HA1 male 55 healthy  
HA2 male 60 healthy  
HA3 male 49 healthy  
HP1 male 61 herpes zoster  
HP2 male 66 herpes zoster  
HP3 female 28 herpes zoster  
RP1 female 61 recovered from herpes zoster  
RP2 male 66 recovered from herpes zoster  
RP3 female 58 recovered from herpes zoster

### Reporting on race, ethnicity, or other socially relevant groupings

the socially constructed or socially relevant categorization variable(s) were not used in this manuscript, all participants were enrolled based on their disease progression and other physical indicators including age, gender, with/without other chronic basic disease.

### Population characteristics

Sample ID Sex Age State  
HA1 male 55 healthy  
HA2 male 60 healthy  
HA3 male 49 healthy  
HP1 male 61 herpes zoster  
HP2 male 66 herpes zoster  
HP3 female 28 herpes zoster  
RP1 female 61 recovered from herpes zoster  
RP2 male 66 recovered from herpes zoster  
RP3 female 58 recovered from herpes zoster

### Recruitment

Participants were patients who came to the Affiliated Hospital of Jiaxing University for treatment and were enrolled in the study program after obtaining informed consent

### Ethics oversight

Affiliated Hospital of Jiaxing University

Note that full information on the approval of the study protocol must also be provided in the manuscript.

## Field-specific reporting

Please select the one below that is the best fit for your research. If you are not sure, read the appropriate sections before making your selection.

Life sciences  Behavioural & social sciences  Ecological, evolutionary & environmental sciences

For a reference copy of the document with all sections, see [nature.com/documents/nr-reporting-summary-flat.pdf](https://nature.com/documents/nr-reporting-summary-flat.pdf)

## Life sciences study design

All studies must disclose on these points even when the disclosure is negative.

### Sample size

three healthy controls, three blood sample were collected during the onset of herpes zoster (HP group) and the blood sample after recovery were collected 90 days after first negative diagnose date (RP group).

### Data exclusions

no data exclusion

### Replication

the experiments were replicated using different individual samples ( $n \geq 10$ ) to ensure the experimental results.

### Randomization

the participants were allocated according to their disease progression and physical condition.

### Blinding

the collection and analysis were performed by different researchers to avoid bias.

## Reporting for specific materials, systems and methods

We require information from authors about some types of materials, experimental systems and methods used in many studies. Here, indicate whether each material, system or method listed is relevant to your study. If you are not sure if a list item applies to your research, read the appropriate section before selecting a response.

## Materials & experimental systems

| n/a                                 | Involved in the study                                  |
|-------------------------------------|--------------------------------------------------------|
| <input type="checkbox"/>            | <input checked="" type="checkbox"/> Antibodies         |
| <input checked="" type="checkbox"/> | <input type="checkbox"/> Eukaryotic cell lines         |
| <input checked="" type="checkbox"/> | <input type="checkbox"/> Palaeontology and archaeology |
| <input checked="" type="checkbox"/> | <input type="checkbox"/> Animals and other organisms   |
| <input checked="" type="checkbox"/> | <input type="checkbox"/> Clinical data                 |
| <input checked="" type="checkbox"/> | <input type="checkbox"/> Dual use research of concern  |
| <input checked="" type="checkbox"/> | <input type="checkbox"/> Plants                        |

## Methods

| n/a                                 | Involved in the study                              |
|-------------------------------------|----------------------------------------------------|
| <input checked="" type="checkbox"/> | <input type="checkbox"/> ChIP-seq                  |
| <input type="checkbox"/>            | <input checked="" type="checkbox"/> Flow cytometry |
| <input checked="" type="checkbox"/> | <input type="checkbox"/> MRI-based neuroimaging    |

## Antibodies

### Antibodies used

Antibody Specificity Clone Vendor Fluorochrome Cat# Usage  
 CD45RO human UCHL1 BD APC-Cy7 304227 flow  
 CD33 human P67.6 BioLegend APC 366605 flow  
 CD56 human HCD56 BioLegend APC 318309 flow  
 KLRG1 human SA231A2 ThermoFisher PerCP-Cy5.5 367707 flow  
 CD25 human M-A251 BioLegend APC 356109 flow  
 CD138 human DL101 BioLegend APC 352307 flow  
 CD3 human OKT3 BioLegend FITC 317305 flow  
 CD8 human SK1 BioLegend BV510 344731 flow  
 CD4 human RPA-T4 BioLegend PerCP-Cy5.5 300529 flow  
 CD62L human DREG-56 BioLegend PE 304805 flow  
 CD66b human 6/40C BioLegend BV421 392915 flow  
 CD192 human KO36C2 BioLegend PE 357205 flow  
 CD11b human ICRF44 BioLegend FITC 301329 flow  
 CD244 human 2-69 BioLegend PE 393507 flow  
 CD122 human TU27 BioLegend PE-Cy7 339013 flow  
 CD14 human 63D3 BioLegend PerCP-Cy5.5 367109 flow  
 CD196 human G034E3 BioLegend PE 353409 flow  
 CD16 human EPR22409-124 ABCAM AV488 AB270139 flow  
 CD27 human 323 EBOSCIENCE FITC 11-0279-42 flow  
 CD19 human 6D5 ABCAM APC AB25484 flow

### Validation

Antibody Specificity Clone Vendor Fluorochrome Cat# Usage  
 CD45RO human UCHL1 BD APC-Cy7 304227 flow  
 CD33 human P67.6 BioLegend APC 366605 flow  
 CD56 human HCD56 BioLegend APC 318309 flow  
 KLRG1 human SA231A2 ThermoFisher PerCP-Cy5.5 367707 flow  
 CD25 human M-A251 BioLegend APC 356109 flow  
 CD138 human DL101 BioLegend APC 352307 flow  
 CD3 human OKT3 BioLegend FITC 317305 flow  
 CD8 human SK1 BioLegend BV510 344731 flow  
 CD4 human RPA-T4 BioLegend PerCP-Cy5.5 300529 flow  
 CD62L human DREG-56 BioLegend PE 304805 flow  
 CD66b human 6/40C BioLegend BV421 392915 flow  
 CD192 human KO36C2 BioLegend PE 357205 flow  
 CD11b human ICRF44 BioLegend FITC 301329 flow  
 CD244 human 2-69 BioLegend PE 393507 flow  
 CD122 human TU27 BioLegend PE-Cy7 339013 flow  
 CD14 human 63D3 BioLegend PerCP-Cy5.5 367109 flow  
 CD196 human G034E3 BioLegend PE 353409 flow  
 CD16 human EPR22409-124 ABCAM AV488 AB270139 flow  
 CD27 human 323 EBOSCIENCE FITC 11-0279-42 flow  
 CD19 human 6D5 ABCAM APC AB25484 flow

## Plants

|                       |                                                    |
|-----------------------|----------------------------------------------------|
| Seed stocks           | Not applicable, this study did not involve plants. |
| Novel plant genotypes | Not applicable, this study did not involve plants. |
| Authentication        | Not applicable, this study did not involve plants. |

## Flow Cytometry

### Plots

Confirm that:

- The axis labels state the marker and fluorochrome used (e.g. CD4-FITC).
- The axis scales are clearly visible. Include numbers along axes only for bottom left plot of group (a 'group' is an analysis of identical markers).
- All plots are contour plots with outliers or pseudocolor plots.
- A numerical value for number of cells or percentage (with statistics) is provided.

### Methodology

|                           |                                                                                                                                                                                                                                                                                                                                                                                                                                                                                                                                                                                                                                                       |
|---------------------------|-------------------------------------------------------------------------------------------------------------------------------------------------------------------------------------------------------------------------------------------------------------------------------------------------------------------------------------------------------------------------------------------------------------------------------------------------------------------------------------------------------------------------------------------------------------------------------------------------------------------------------------------------------|
| Sample preparation        | The whole blood underwent PBMC isolation through density gradient centrifugation using Histopaque-1077 in accordance with the manufacturer's guidelines. Specifically, the blood was mixed in a 1:1 ratio with D-PBS (Absin, abs970) containing 2mM EDTA(Corning, 46-034-Cl), the diluted blood were overlaid on Lymphocytes separation medium (Absin, abs930), and centrifuged at 2000 rpm for 30 minutes at 4 degrees Celsius. PBMC were then extracted from the plasma-Histopaque interface. After washed in D-PBS(Absin, abs970) with 2mM EDTA(Corning, 46-034-Cl), extracted PBMCs were cryopreserved in Cell freezing solution(Absin, abs9417). |
| Instrument                | FACSCanto II (BD Biosciences)                                                                                                                                                                                                                                                                                                                                                                                                                                                                                                                                                                                                                         |
| Software                  | FlowJo v10.6 software (Tree Star)                                                                                                                                                                                                                                                                                                                                                                                                                                                                                                                                                                                                                     |
| Cell population abundance | The sequencing sample used in this study were human peripheral blood samples, therefore the sample of flow analysis were also human peripheral blood immune cells isolated by ficoll centrifugation. After centrifugation, a cell counter was used to determine the cell number contained in each sample, and the same number of cells was used for each set of analyses. Positive cells were strictly determined by flow analysis of fluorescence intensity compared to a negative control (no antibody added).                                                                                                                                      |
| Gating strategy           | monocytes: fsc/ssc gates-cd14/cd16 gates; t cell: fsc/ssc gates-cd3 gates-cd4/cd8 gates; CD8 effector tcell: t cell: fsc/ssc gates-CD3/CD8 gates-klrg1-CD122 gates; CD8 effector memory t cell: fsc/ssc gates-CD3/CD8 gates-CD45RO gates-KLRG1 gates; B cell: fsc/ssc gates-CD19 gates; neutriphils: fsc/ssc gates-CD11b gates-CD62L -CD14-CD66B gates.<br>the gating strategy is provided in the main figures.                                                                                                                                                                                                                                       |

Tick this box to confirm that a figure exemplifying the gating strategy is provided in the Supplementary Information.
